# Supplementary material
Source: PubMed Central journal article supplement (PMC4468700)
Supplement: AAC.05008-14_zac007154136so1.pdf [file AAC.05008-14_zac007154136so1.pdf]

## Supplementary Materials

**First detection of AmpC  $\beta$ -lactamase *bla*<sub>CMY-2</sub> on a conjugative IncA/C plasmid in  
*Vibrio parahaemolyticus* of food origin**

Ruichao Li, Dachuan Lin, Kaichao Chen, Marcus Ho Yin Wong, Sheng Chen\*

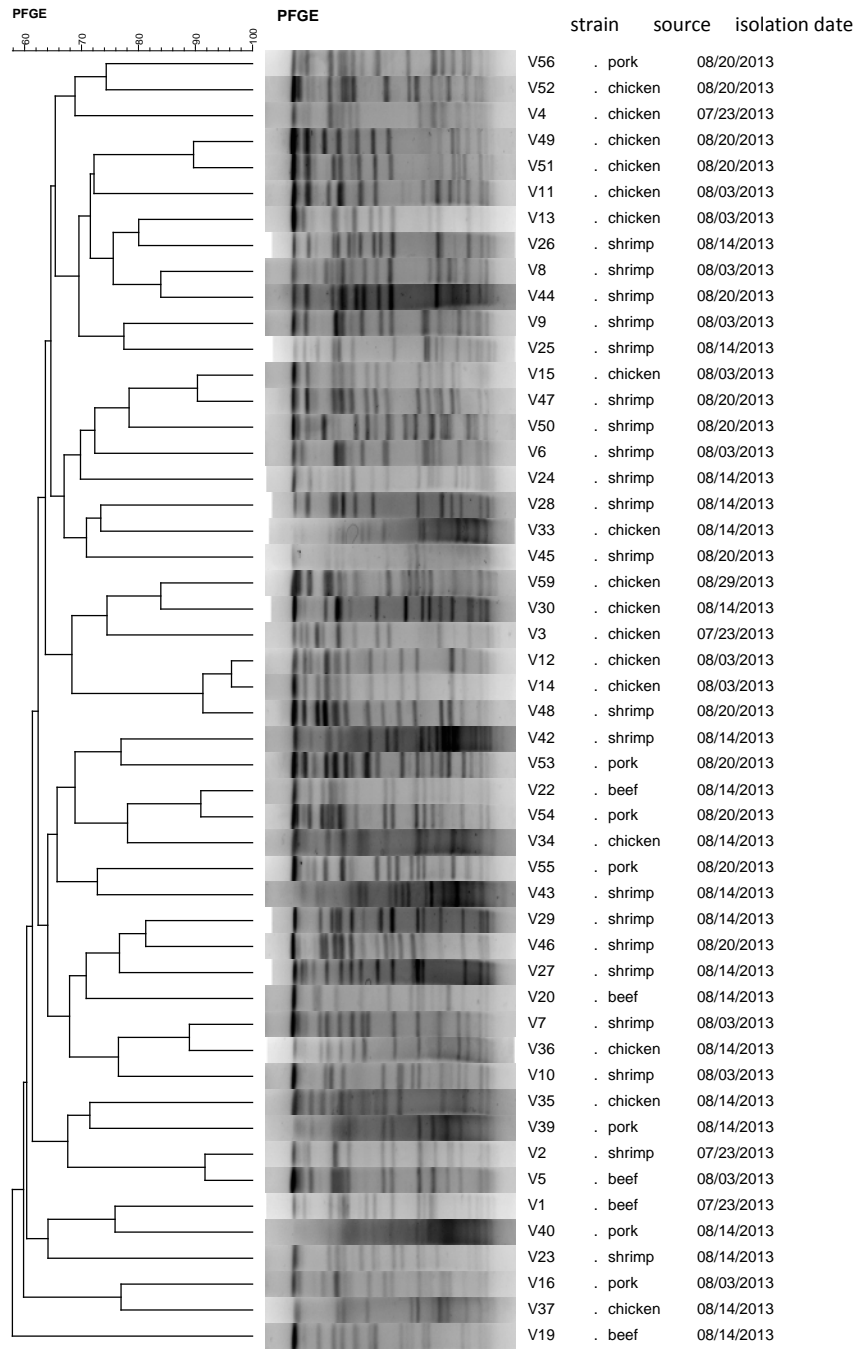

**Figure S1. PFGE dendrogram of 49 food *V. parahaemolyticus* isolates analyzed by Bionumerics software after NotI digestion (5 out of 54 isolates were untypable).**

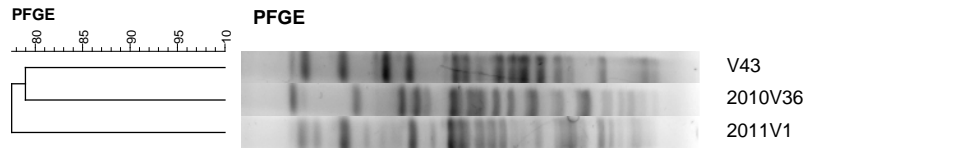

**Figure S2. UPGMA analysis of PFGE profiles of three *bla*<sub>PER-1</sub> positive *Vibrio parahaemolyticus* digested with SfiI.**
